# Supplementary material
Source: Frontiers journal article supplement (https://www.frontiersin.org/articles/233479)
Supplement: Data_Sheet_1.XLSX [file Data_Sheet_1.XLSX]

## Sheet: Annex
Supplementary Table. Mean, VaR(95%) and ES(95%) for each city under RCP8.5. Data are shown in millions of US dollars.
City	2030			2035			2040			2045			2050			2055			2060			2065			2070			2075			2080			2085			2090			2095			2100
	Mean	VaR(95%)	ES(95%)	Mean	VaR(95%)	ES(95%)	Mean	VaR(95%)	ES(95%)	Mean	VaR(95%)	ES(95%)	Mean	VaR(95%)	ES(95%)	Mean	VaR(95%)	ES(95%)	Mean	VaR(95%)	ES(95%)	Mean	VaR(95%)	ES(95%)	Mean	VaR(95%)	ES(95%)	Mean	VaR(95%)	ES(95%)	Mean	VaR(95%)	ES(95%)	Mean	VaR(95%)	ES(95%)	Mean	VaR(95%)	ES(95%)	Mean	VaR(95%)	ES(95%)	Mean	VaR(95%)	ES(95%)
Amsterdam	38.8151	125.034	162.398	58.005	175.059	217.902	81.1165	225.576	273.986	107.562	276.908	330.688	136.759	328.803	388.211	168.673	382.245	447.722	202.267	436.457	507.534	237.857	492.564	569.437	274.786	549.106	632.431	313.105	607.645	696.884	352.594	667.338	763.166	393.583	728.965	831.295	435.732	791.778	901.081	478.964	856.104	972.23	523.221	922.384	1046.22
Athens	-0.124735	0.080814	0.164669	-0.00539028	0.27343	0.392494	0.128732	0.500348	0.666332	0.28127	0.770148	1.00551	0.45964	1.09129	1.49778	0.715704	1.50343	2.62184	1.1004	1.99365	5.80168	1.82009	4.10952	14.7956	3.27997	10.2317	33.5908	6.1908	17.8381	71.8725	11.5786	60.6385	132.4	20.7558	115.225	208.013	35.1989	182.215	301.996	56.3472	264.614	418.016	85.8633	366.379	563.893
Barcelona	17.9926	59.7312	107.121	32.4951	131.347	187.517	54.8877	206.211	271.776	85.5373	284.86	360.059	123.898	367.073	452.781	169.418	454.128	551.579	220.608	545.334	654.403	277.431	642.564	764.187	338.78	743.798	879.64	404.558	851.688	1001.6	474.39	965.142	1130.97	548.803	1085.72	1268.14	627.386	1212.43	1413.1	710.111	1346.11	1565.59	797.054	1487.86	1728.87
Copenhagen	21.6429	76.3574	109.878	32.3553	115.529	154.793	45.9325	155.69	200.977	62.1799	197.138	248.457	80.8305	239.643	297.426	101.976	284.094	348.998	124.92	329.822	401.577	149.908	377.955	456.991	176.48	427.075	514.264	204.667	478.779	573.812	234.279	532.248	636.07	265.628	588.336	701.132	298.419	646.293	768.836	332.57	706.501	838.863	368.052	769.491	913.03
Dublin	47.7188	191.147	313.718	82.4599	351.362	493.73	131.749	515.044	677.941	195.255	683.293	866.483	271.661	855.291	1060.07	360.357	1033.98	1262.35	458.357	1217.22	1467.99	565.954	1409.01	1683.36	680.874	1604.33	1905.05	802.856	1808.78	2134.46	930.907	2019.47	2373.06	1065.99	2239.36	2621.12	1206.82	2465.82	2878.06	1353.05	2700.16	3142.83	1504.46	2944.18	3421.37
Glasgow	29.7358	89.0349	258.105	55.3868	279.925	504.558	94.6849	500.561	757.364	148.877	726.334	1014.83	217.945	955.878	1277.99	302.075	1193.2	1551.98	399.084	1435.36	1828.78	509.353	1688.49	2118.3	630.777	1944.66	2415.03	762.813	2212.47	2721.09	904.064	2487.32	3038.62	1055.55	2773.64	3367.89	1215.57	3067.27	3707.85	1383.2	3370.09	4056.72	1557.88	3684.72	4423.59
Hamburg	67.8431	196.683	243.971	99.1311	264.698	318.846	135.783	333.435	394.544	176.654	403.312	471.122	220.805	474.015	548.841	268.22	546.852	629.236	317.458	620.785	710.13	369.067	697.24	793.78	422.209	774.379	878.932	477.034	854.176	966.054	533.312	935.572	1055.61	591.503	1019.55	1147.64	651.211	1105.18	1241.89	712.374	1192.88	1338.01	774.929	1283.2	1437.86
Helsinki	2.70267	5.1113	7.53244	3.50185	7.42875	11.7461	4.53508	9.89667	18.4327	5.8734	16.4136	27.7818	7.57497	24.5169	37.9748	9.85497	33.4619	49.3482	12.5655	43.0247	61.4495	15.7775	53.5086	74.7965	19.4752	64.6076	89.1958	23.6976	76.7662	104.829	28.429	89.8229	121.892	33.7344	104.068	140.522	39.6075	119.345	160.745	46.0291	135.822	182.508	53.0311	153.732	206.631
Istambul	200.631	1101.47	2070.88	382.305	2135.64	3331.12	642.433	3243.95	4692.94	982.346	4438.59	6161.34	1400.12	5715.93	7747.9	1898.51	7103.89	9493.92	2467.74	8590.66	11353.5	3116.47	10222.6	13404.3	3836.79	11953.6	15617.6	4632.38	13851.3	18020.6	5500.68	15891.7	20642.8	6454.29	18118.8	23504.2	7489.36	20509.7	26609.2	8604.69	23090	29951.2	9805.67	25895.3	33649.1
Izmir	131.799	435.667	711.494	244.505	891.696	1222.02	412.246	1374.18	1763.71	637.209	1886.91	2338.21	914.984	2429.21	2948.77	1240.7	3009.12	3605.81	1604.67	3623.63	4298.13	2007.16	4285.16	5044.81	2441.57	4982.11	5838.99	2908.35	5732.06	6687.06	3406.16	6529.24	7596.06	3939.33	7384.81	8569.96	4506.43	8293.61	9610.19	5108.27	9262.29	10716.4	5746.3	10299.7	11912.1
Lisbon	65.1002	220.574	321.781	110.354	379.695	499.241	174.527	545.622	684.698	256.536	719.486	878.485	353.988	900.805	1081.47	465.667	1092.73	1297.52	587.726	1293.32	1521.85	720.502	1506.51	1760.59	861.767	1728.01	2010.99	1011.65	1963.37	2274.78	1169.59	2210.27	2553.79	1336.86	2471.93	2848.78	1512.73	2746.26	3159.69	1697.23	3034.95	3485.95	1890.55	3340.28	3834.19
London	56.2782	199.242	261.394	82.9953	273.627	344.27	114.755	347.902	427.041	150.747	422.599	509.777	190.222	497.3	592.801	233.225	573.541	677.928	278.317	650.096	762.488	326.007	728.732	849.302	375.334	807.116	936.758	426.366	887.678	1025.41	478.749	969.069	1115.8	532.989	1052.46	1207.9	588.506	1136.67	1301.39	645.163	1222.18	1395.81	702.828	1309.6	1493.32
Marseille	13.3231	35.8163	63.6689	23.5761	83.6834	140.267	40.7607	161.986	228.154	66.5064	244.45	320.479	101.233	330.874	417.689	144.806	422.558	521.45	195.817	518.854	629.743	253.981	621.7	745.582	317.976	729.073	867.699	387.446	843.713	996.983	461.828	964.547	1134.41	541.545	1093.22	1280.42	626.096	1228.74	1435.07	715.407	1372.03	1598.13	809.544	1524.27	1773.03
Naples	9.86792	30.9012	42.6826	16.7001	50.9871	68.2104	25.9275	75.6423	95.8583	37.6089	101.716	125.031	51.634	129.16	155.88	67.9284	158.403	188.953	86.0498	189.244	223.625	106.06	222.298	260.848	127.63	256.955	300.249	150.772	294.086	342.126	175.395	333.376	386.808	201.699	375.361	434.462	229.588	419.757	485.128	259.08	466.869	538.762	290.227	517.105	596.484
Odessa	116.248	484.639	1190.64	218.925	1208.56	2087.35	371.262	1989.59	3064.21	576.748	2837.04	4125.59	836.164	3748.73	5280.92	1153.44	4746.38	6563.09	1522.76	5821.31	7937.53	1950.38	7009.14	9464.91	2431.92	8275.72	11124.4	2970.48	9673.31	12938.6	3564.51	11184.5	14931.9	4223.05	12844.3	17122.4	4944.42	14636	19515.2	5727.57	16580.5	22105.9	6577.28	18707.2	24994.4
Porto	19.0909	55.869	82.6212	29.98	96.0619	127.64	45.0978	137.876	174.586	64.3679	181.599	223.534	87.3769	227.09	274.698	114.104	275.318	329.237	143.492	325.608	385.722	175.62	378.974	445.749	209.918	434.28	508.578	246.386	492.961	574.643	284.843	554.393	644.407	325.593	619.401	718.047	368.411	687.414	795.525	413.279	758.856	876.667	460.227	834.297	963.185
Rotterdam	236.72	998.244	1367.83	411.522	1519.06	1946.42	638.624	2050.18	2537.09	910.415	2594.96	3140.31	1218.83	3150.99	3758.24	1559.33	3726.09	4400.73	1922.39	4314.86	5052.97	2310.42	4929.16	5733.74	2716.22	5554.09	6432.94	3140.17	6206.2	7154.72	3580.01	6876.95	7903.31	4039.27	7574.95	8679.35	4514.63	8292.52	9481.17	5005.49	9033.48	10305.8	5511.49	9802.96	11170.1
St. Petersburg	105.686	524.744	947.561	182.567	957.854	1454.48	287.426	1401.2	1975.39	419.514	1858.35	2510.42	576.957	2326.27	3061.86	760.091	2814.22	3641.96	963.853	3315.41	4231.96	1190.27	3843.94	4855.06	1435.41	4381.75	5498.62	1699.21	4948.85	6167.79	1979.52	5534.75	6867.97	2279.44	6150.08	7600.26	2596.05	6785.16	8362.33	2927.84	7444.65	9149.72	3274.32	8135.09	9985.97
Stockholm	-0.115739	0.17832	0.309389	0.0278129	0.42665	0.614737	0.188613	0.719742	0.988034	0.373025	1.06887	1.49798	0.598864	1.48466	2.4359	0.946312	2.00664	4.9349	1.53275	2.62981	11.6502	2.65888	6.3709	27.4633	4.80297	11.7579	58.875	8.67921	38.1237	113.761	15.1978	85.9907	184.527	25.4482	145.384	273.168	40.6211	218.148	383.497	61.8493	307.535	519.641	90.6689	417.875	691.561
